# Supplementary material
Source: Springer Nature journal article supplement (https://www.springermedizin.de/resource/supplementary/13550_2012_71_MOESM8_ESM.pdf/9687552)

**Supplementary Figure 11. Transverse and coronal slices of the L phantom obtained after 24 iterations.** (A, E) Philips Brighview XCT and Astonish. (B, F) General Electric Discovery NM/CT 670 and Evolution for Bone. (C, G) General Electric Infinia Hawkeye-4 and Evolution for Bone. (D, H) Siemens Symbia T6 and Flash3D. All were reconstructions with eight subsets. Hot iron color scale from 0 to 110% of slice maximum.

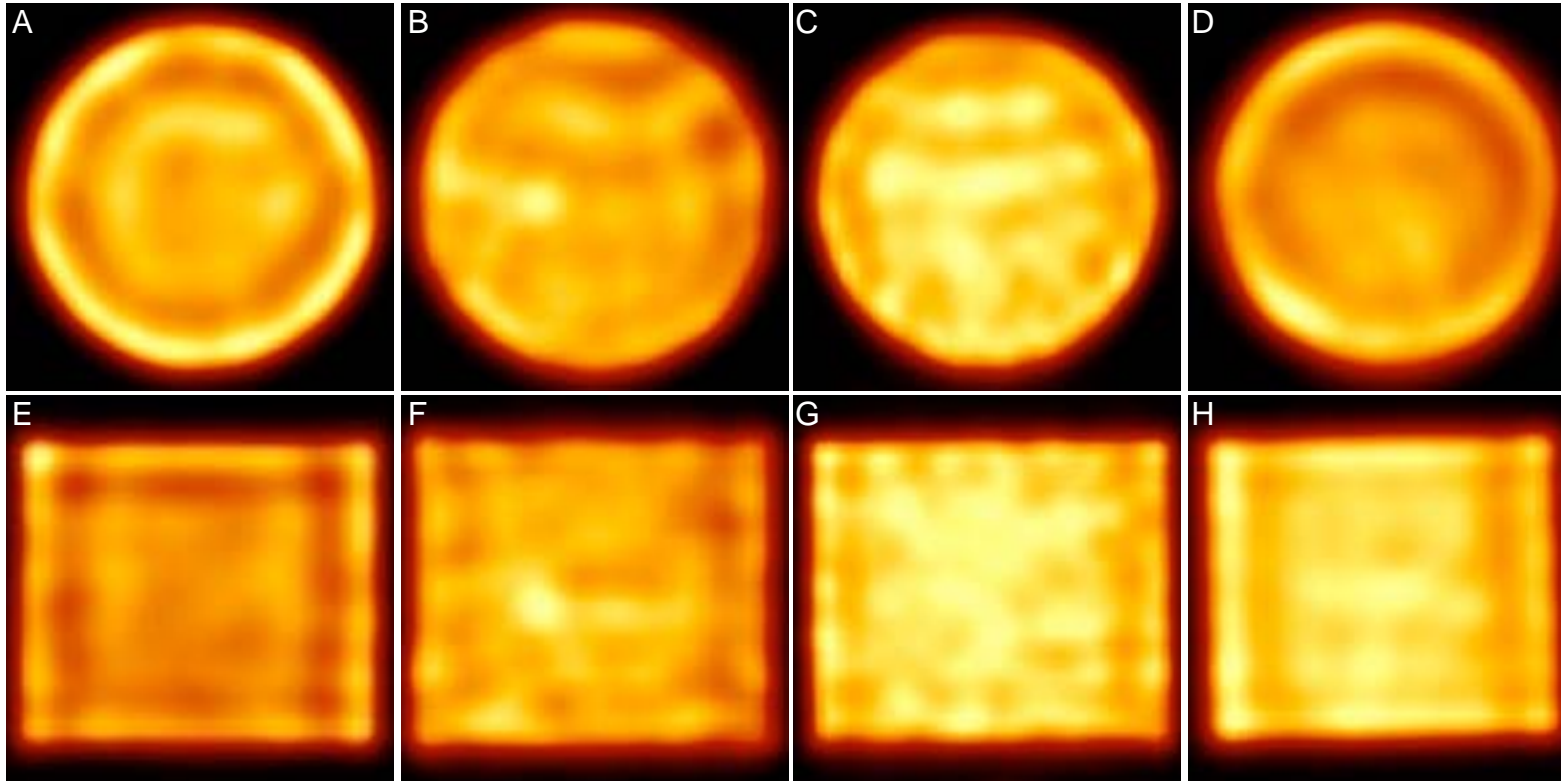

Supplement: MOESM8 [file 9687552]
